# Supplementary material
Source: Springer Nature journal article supplement (http://www.nature.com/nbt/journal/v20/n4/extref/nbt0402-370-S4.pdf)

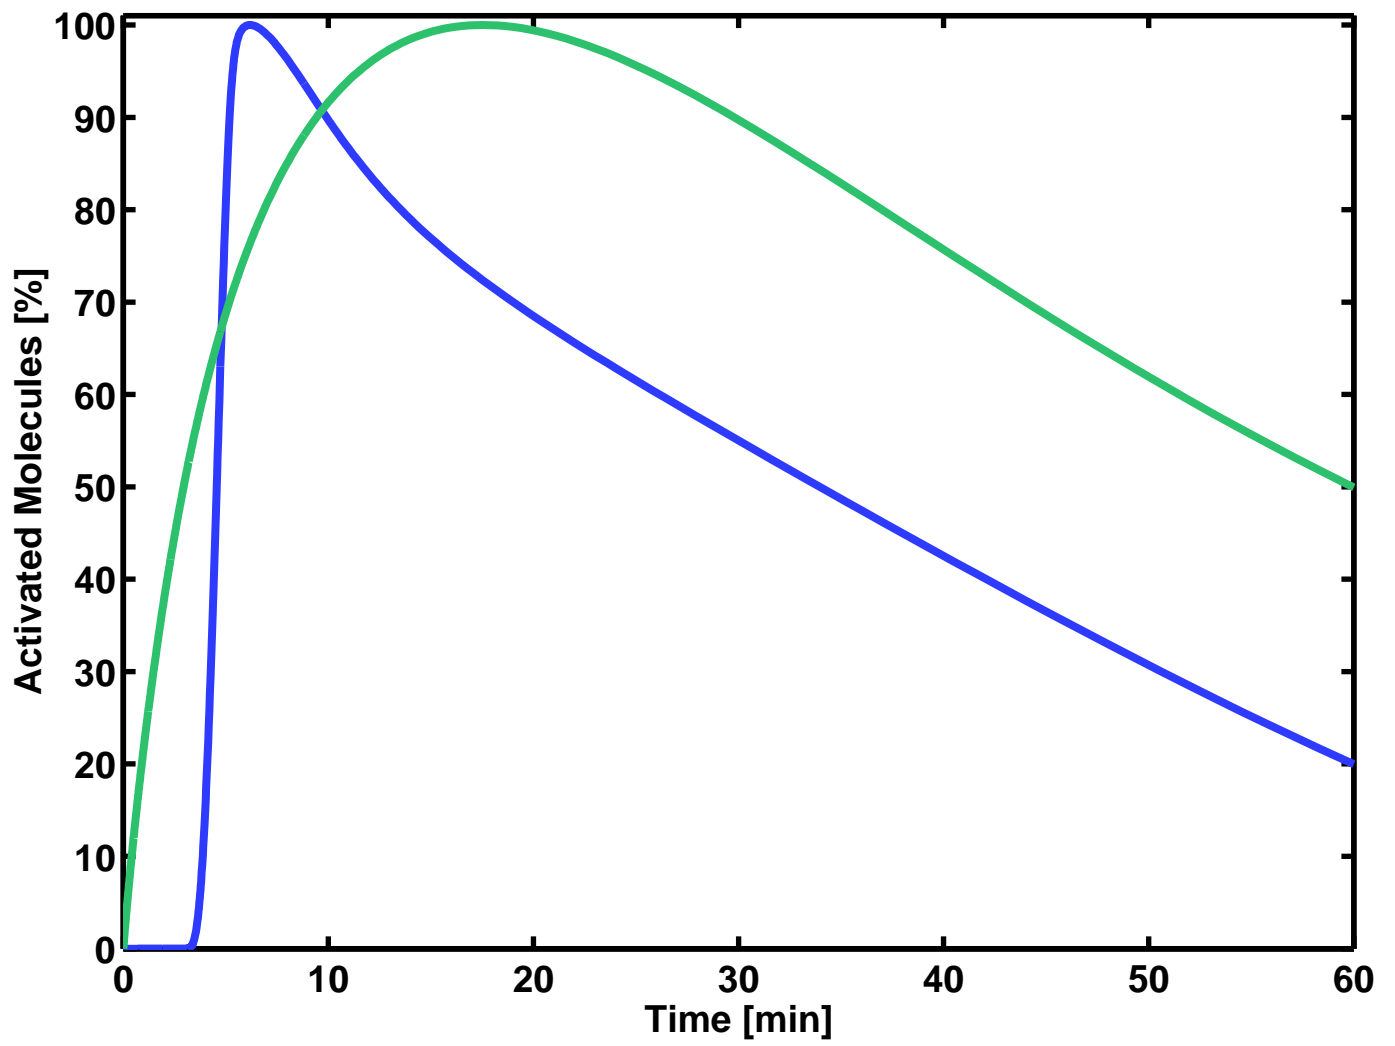

Supplement: nbt0402-370-S4.pdf [file nbt0402-370-S4.pdf]
